# Supplementary material for: Dynamic averaging of anisotropic interactions and its dependence on motional time scales in MAS solid-state NMR
Source: Copernicus journal article supplement (doi:10.5194/mr-2024-4), 2024-02-21
Supplement: Supplementary file 1 [file mr-2024-4-supplement.pdf]

## Contents

|                                            |          |
|--------------------------------------------|----------|
| <b>S1 Summary of Simulation Parameters</b> | <b>1</b> |
| <b>S2 Additional Figures</b>               | <b>3</b> |

## S1 Summary of Simulation Parameters

**Table S1.** Summary of simulation parameters. In simulations of heteronuclear two-spin systems (CP, REDOR, wPARS and off-MAS) I spins correspond to protons and S spins correspond to  $^{13}\text{C}$ . More than 538 powder orientations are only necessary for simulations of quadrupolar spectra. All simulation programs are freely available in the data repository.

| Experiment          | Initial Density Op.         | Detection Op.                                             | No. of Crystallites | Time Resolution                   |
|---------------------|-----------------------------|-----------------------------------------------------------|---------------------|-----------------------------------|
|                     | $\hat{\rho}_{\text{init.}}$ | $\hat{D}$                                                 | $M$                 | $\Delta t$                        |
| CP                  | $\hat{I}_x$                 | $\sin \vartheta_1 \hat{S}_x + \cos \vartheta_1 \hat{S}_z$ | 10000               | $0.5 \mu\text{s}$ (20 kHz MAS)    |
|                     |                             |                                                           |                     | $0.167 \mu\text{s}$ (60 kHz MAS)  |
|                     |                             |                                                           |                     | $0.1 \mu\text{s}$ (100 kHz MAS)   |
| REDOR               | $\hat{S}_x$                 | $\hat{S}_x$                                               | 10000               | $0.25 \mu\text{s}$ (20 kHz MAS)   |
|                     |                             |                                                           |                     | $0.042 \mu\text{s}$ (60 kHz MAS)  |
|                     |                             |                                                           |                     | $0.05 \mu\text{s}$ (100 kHz MAS)  |
| wPARS               | $\hat{S}_x$                 | $\hat{S}_x$                                               | 10000               | $0.25 \mu\text{s}$ (20 kHz MAS)   |
|                     |                             |                                                           |                     | $0.042 \mu\text{s}$ (60 kHz MAS)  |
|                     |                             |                                                           |                     | $0.05 \mu\text{s}$ (100 kHz MAS)  |
| off-MAS             | $\hat{I}_x$                 | $\hat{I}_x$                                               | 538                 | $0.5 \mu\text{s}$ (20 kHz MAS)    |
|                     |                             |                                                           |                     | $0.167 \mu\text{s}$ (60 kHz MAS)  |
|                     |                             |                                                           |                     | $0.1 \mu\text{s}$ (100 kHz MAS)   |
| CSA recoupling      | $\hat{I}_x$                 | $\hat{I}_x$                                               | 1154                | $0.556 \mu\text{s}$ (20 kHz MAS)  |
|                     |                             |                                                           |                     | $0.185 \mu\text{s}$ (60 kHz MAS)  |
|                     |                             |                                                           |                     | $0.111 \mu\text{s}$ (100 kHz MAS) |
| Quadrupolar spectra | $\hat{I}_x$                 | $\hat{I}^-$                                               | 10000               | $0.125 \mu\text{s}$ (20 kHz MAS)  |

**Table S2.** Summary of radio-frequency field strengths used for simulations of pulsed dipolar recoupling under MAS shown in the main text.

| MAS     | CP         |            | REDOR      |            | wPARS      |            |
|---------|------------|------------|------------|------------|------------|------------|
|         | $\nu_{1I}$ | $\nu_{1S}$ | $\nu_{1I}$ | $\nu_{1S}$ | $\nu_{1I}$ | $\nu_{1S}$ |
| 20 kHz  | 93 kHz     | 73 kHz     | 100 kHz    | 100 kHz    | 100 kHz    | 100 kHz    |
| 60 kHz  | 37 kHz     | 23 kHz     | 100 kHz    | 100 kHz    | 300 kHz    | 300 kHz    |
| 100 kHz | 63 kHz     | 37 kHz     | 1000 kHz   | 1000 kHz   | 500 kHz    | 500 kHz    |

## 5 S2 Additional Figures

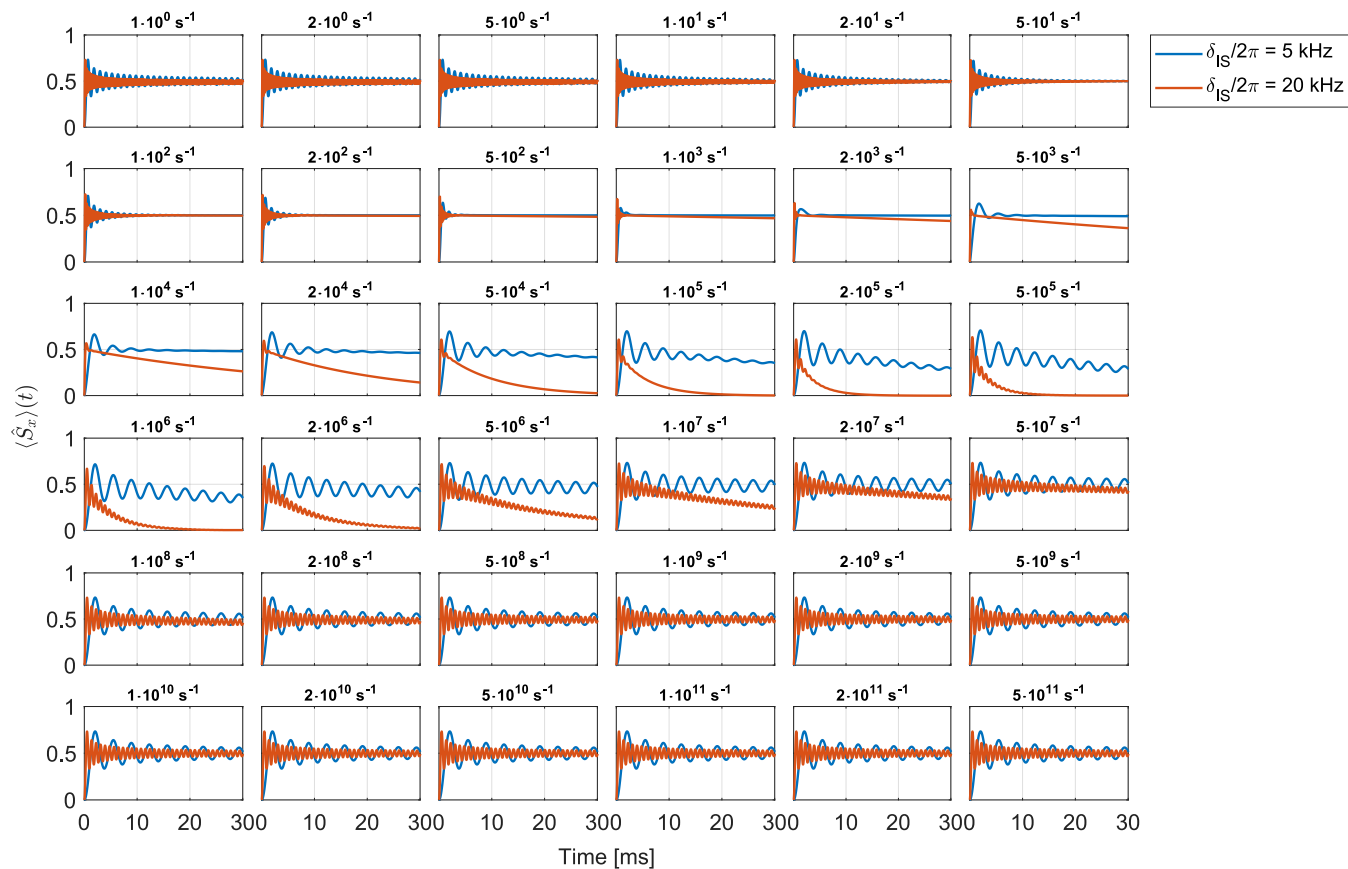

**Figure S1.** Simulated CP polarization transfer for a heteronuclear spin pair with different dipolar coupling strengths  $\delta_{IS}$  for the  $n = 1$  zero-quantum matching condition (see Table S2 for rf field strengths). Shown are the resulting recoupling curves for all simulated exchange-rate constants between  $1 \text{ s}^{-1}$  and  $5 \cdot 10^{11} \text{ s}^{-1}$  for a MAS frequency of 20 kHz. In the intermediate exchange regime, signal decay due to rotating frame relaxation is observed. This mostly affects the recoupling curves for long contact times and only has a marginal effect on the initial build-up that is used in the  $\chi^2$  fit.

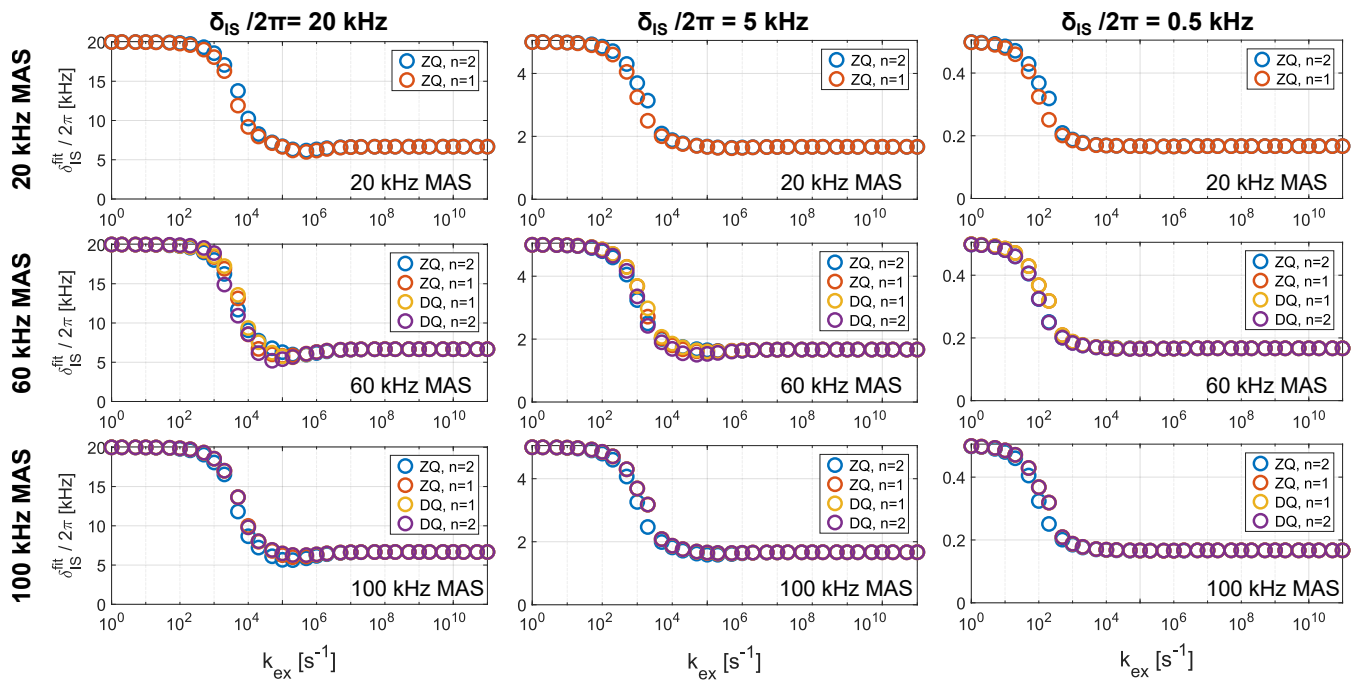

**Figure S2.** Fitted apparent  $\delta_{IS}^{\text{fit}}$  for different CP matching conditions for 20, 60 and 100 kHz MAS (rows) and different dipolar coupling strengths (columns). For the zero-quantum (ZQ) matching conditions ( $\nu_{I1} - \nu_{IS} = n\nu_r$ ) the following radio-frequency field amplitudes ( $\nu_{I1} : \nu_{IS}$ ) were used: 113 kHz : 73 kHz ( $n = 2$ ) and 93 kHz : 73 kHz ( $n = 1$ ) for 20 kHz MAS; 157 kHz : 37 kHz ( $n = 2$ ) and 97 kHz : 37 kHz ( $n = 1$ ) for 60 kHz MAS; 277 kHz : 77 kHz ( $n = 2$ ) and 177 kHz : 77 kHz ( $n = 1$ ) for 100 kHz MAS. For the double-quantum (DQ) matching conditions ( $\nu_{I1} + \nu_{IS} = n\nu_r$ ) the following radio-frequency field amplitudes ( $\nu_{I1} : \nu_{IS}$ ) were used: 83 kHz : 37 kHz ( $n = 2$ ) and 37 kHz : 23 kHz ( $n = 1$ ) for 60 kHz MAS; 129 kHz : 71 kHz ( $n = 2$ ) and 63 kHz : 37 kHz ( $n = 1$ ) for 100 kHz MAS. The underlying molecular motion was modeled using a three-site jump process with an opening angle of  $\theta = 70.5^\circ$ . The observed recoupling behaviour is very similar for all matching conditions. Differences are only observed in the intermediate exchange regime and can be attributed to the different rf field amplitudes that affect the rotating-frame relaxation during the contact time.

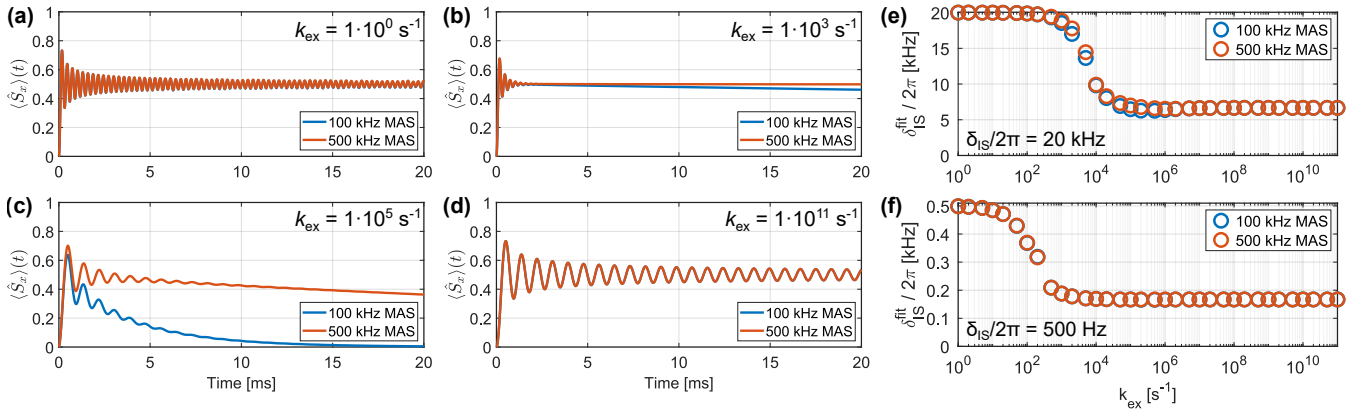

**Figure S3.** Simulated CP recoupling for 100 kHz and 500 kHz MAS for a heteronuclear spin pair. The underlying molecular motion was modeled as a three-site jump process with an opening angle of  $\theta = 70.5^\circ$ . Radio-frequency field amplitudes ( $\nu_{\text{H}} : \nu_{\text{S}}$ ) of: 177 kHz : 77 kHz (for 100 kHz MAS) and 283 kHz : 217 kHz (for 500 kHz MAS) were used. a-d) Comparison of recoupling curves for different exchange-rate constants for a dipolar coupling strength of  $\delta_{\text{IS}}/(2\pi) = 20 \text{ kHz}$ . In the limit of fast and slow exchange, the recoupling curves obtained for the two MAS frequencies are identical (a and d). In the intermediate exchange regime (b and c) loss of magnetization due to relaxation is significantly slower at 500 kHz. e-f) Fitted apparent  $\delta_{\text{IS}}^{\text{fit}}$  as a function of the exchange-rate constant for dipolar coupling strengths of  $\delta_{\text{IS}}/(2\pi) = 20 \text{ kHz}$  (e) and  $\delta_{\text{IS}}/(2\pi) = 0.5 \text{ kHz}$  (f). No significant differences between the two spinning frequencies are observed.

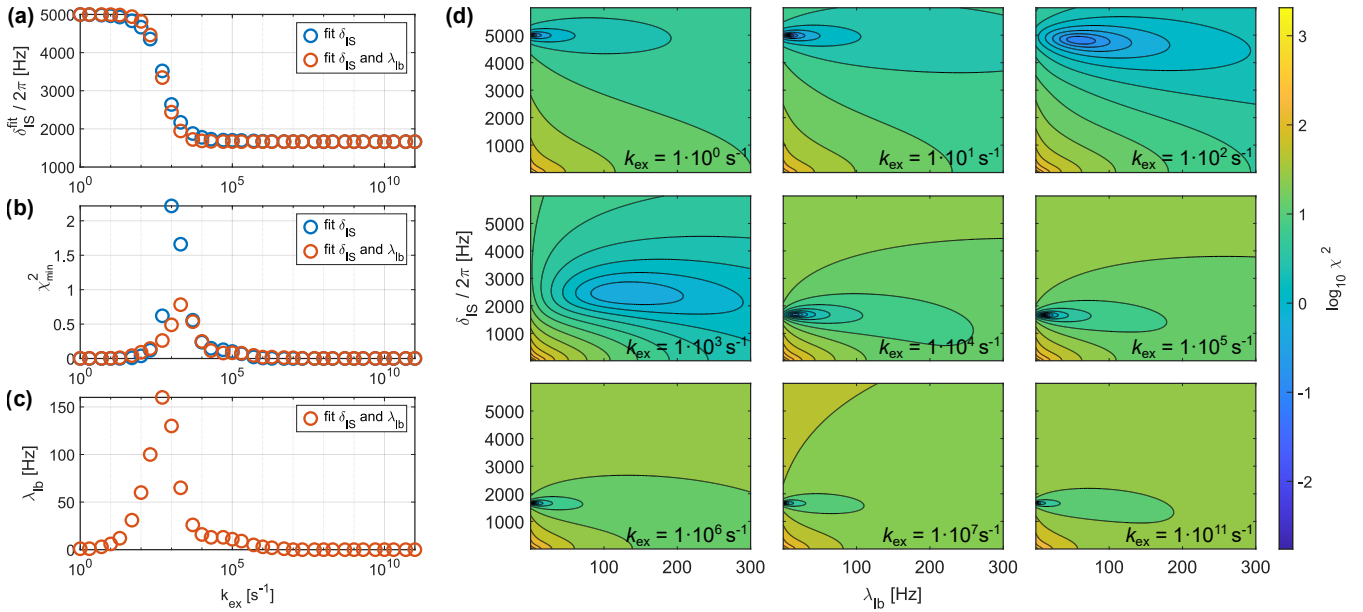

**Figure S4.** Comparison of  $\chi^2$ -fitting routines for wPARS dipolar recoupling (20 kHz MAS,  $\delta_{\text{IS}}/(2\pi) = 5 \text{ kHz}$ ,  $\theta = 70.5^\circ$ ): i) fit of only  $\delta_{\text{IS}}$  (blue circles) and ii) fit of grid with  $\delta_{\text{IS}}$  and an additional exponential broadening parameter  $\lambda_{\text{lb}}$  (applied as:  $\exp(-\lambda_{\text{lb}}\pi t)$  to the recoupling curve) to account for the decay of magnetization due to molecular motion (red circles). a) Resulting  $\delta_{\text{IS}}^{\text{fit}}$  (and  $\lambda_{\text{lb}}$  in c) for the two fitting routines and the corresponding minimum  $\chi_{\text{min}}^2$  value in b). d) Contour plots of  $\chi^2$  for the grid of  $\lambda_{\text{lb}}$  and  $\delta_{\text{IS}}$  used for fitting. Significant broadening is observed for the intermediate exchange regime. However, including  $\lambda_{\text{lb}}$  in the fitting routine has a marginal influence on the obtained  $\delta_{\text{IS}}^{\text{fit}}$  and only leads to a reduction of  $\chi_{\text{min}}^2$ .

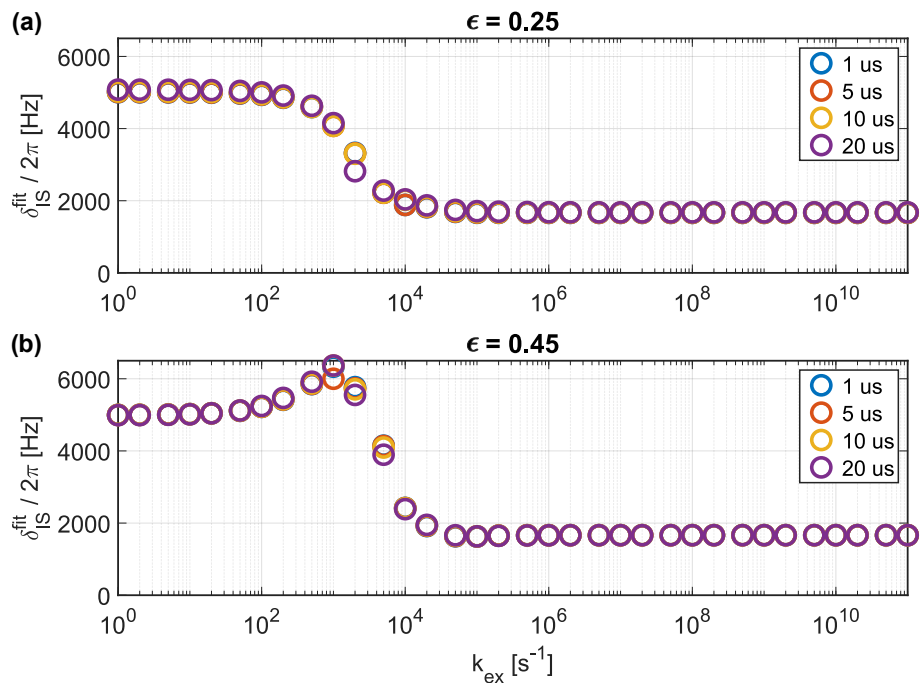

**Figure S5.** Comparison of the fitted apparent anisotropy of the dipolar coupling  $\delta_{IS}^{\text{fit}}$  for REDOR recoupling with different rf field strengths ( $\pi$ -pulse lengths of 1, 5, 10 and 20  $\mu\text{s}$  corresponding to rf field strengths between 25-500 kHz) for  $\epsilon = 0.25$  (no pulse shifting, a) and  $\epsilon = 0.45$  ( $\pi$ -pulses shifted to scale the heteronuclear dipolar coupling, b). Data is shown for a MAS frequency of 20 kHz and  $\delta_{IS}/(2\pi) = 5$  kHz and a three-site jump process with an opening angle of  $\theta = 70.5^\circ$ . No significant differences are observed for the different pulse lengths.

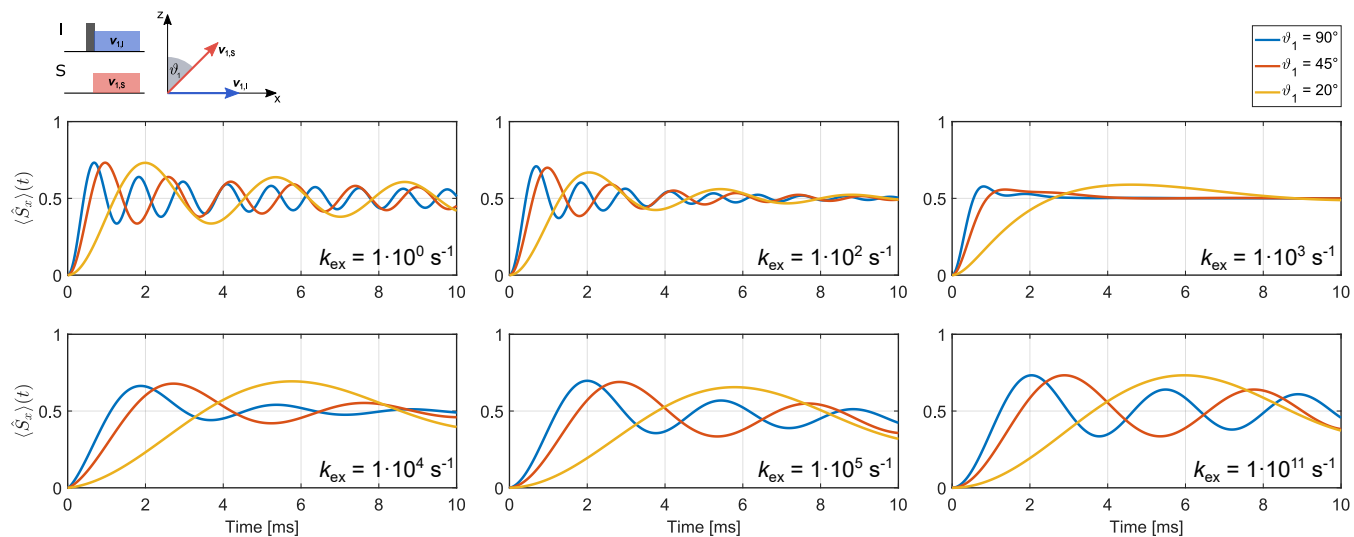

**Figure S6.** Effect of tilting the rf field on one of the two channels during the CP experiment on the observed recoupling behaviour in the presence of molecular motion. Data is shown for different tilt angles  $\vartheta_1$  for a MAS frequency of 20 kHz,  $\delta_{\text{IS}}/(2\pi) = 5$  kHz and  $\theta = 70.5^\circ$ . The rf field amplitudes were set to fulfill the  $n = 1$  zero-quantum matching condition ( $\nu_{\text{I1}} = 93$  kHz,  $\nu_{\text{S1}} = 73$  kHz). Tilting the rf field away from the transverse plane scales the heteronuclear dipolar coupling resulting in slower oscillations in the recoupling curve. The effects of molecular motion on the appearance of the recoupling curve are similar for all tilt angles.

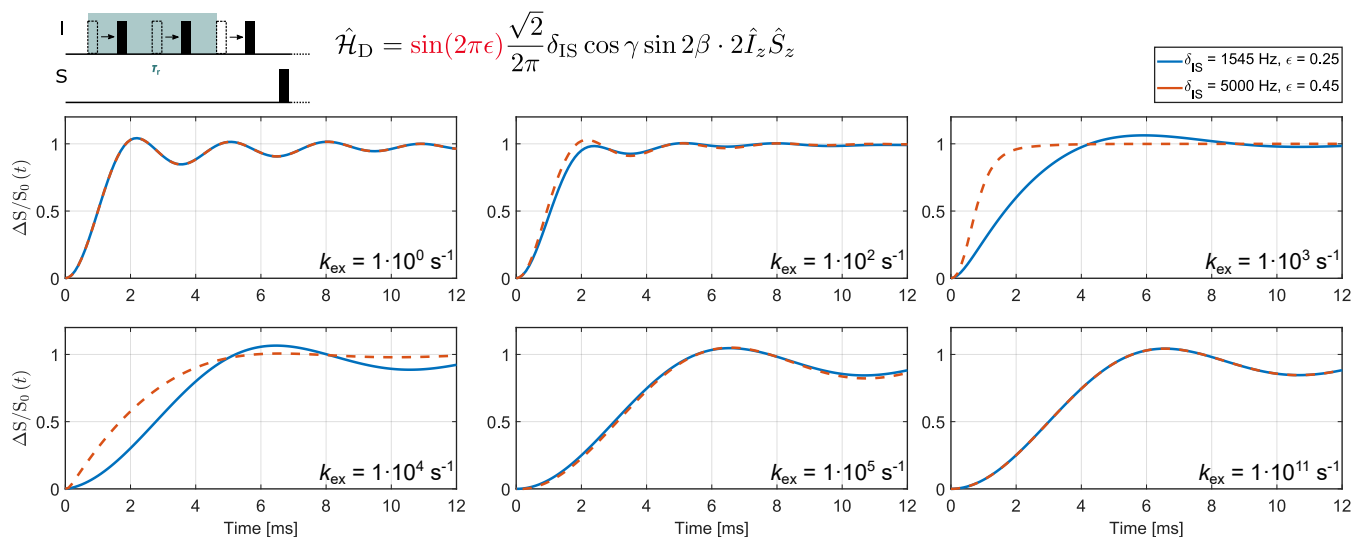

**Figure S7.** Effect of shifting the  $\pi$ -pulses in the REDOR sequence on the appearance of the resulting REDOR curve in dynamic systems. In this implementation of the REDOR sequence, the heteronuclear dipolar coupling can be scaled by shifting both  $\pi$ -pulses while keeping the pulse separation constant at  $\tau_r/2$ . The extent of pulse shift is characterized by the parameter  $\epsilon = \frac{\tau_1 + 0.5\tau_p}{\tau_r} - 0.25$  ( $\tau_1$ : beginning of the first  $\pi$ -pulse,  $\tau_p$ : length of  $\pi$ -pulse,  $\tau_r$ : rotor cycle), where  $\epsilon = 0.25$  corresponds to the unshifted REDOR experiment and the dipolar coupling is scaled by  $\sin(2\pi\epsilon)$ . Data is shown for a MAS frequency of 20 kHz and  $\delta_{IS}/(2\pi) = 5000 \text{ Hz}$  ( $\epsilon = 0.45$ ) as well as  $\delta_{IS}/(2\pi) = 5000 \text{ Hz} \cdot \sin(2\pi \cdot 0.45) \approx 1545 \text{ Hz}$  ( $\epsilon = 0.25$ ). The opening angle of the underlying three-site jump process was set to  $\theta = 70.5^\circ$ . In the limit of slow and fast exchange, identical REDOR curves are obtained. Shifting the  $\pi$ -pulses therefore simply leads to a scaling of the coupling in these exchange regimes. In the intermediate exchange regime on the other hand, shifting the position of the refocusing pulses changes the appearance of the REDOR curve significantly. For the shifted REDOR experiment, a rapid build-up of the curve without oscillations is observed that prevents the extraction of the coupling strength in this exchange regime.



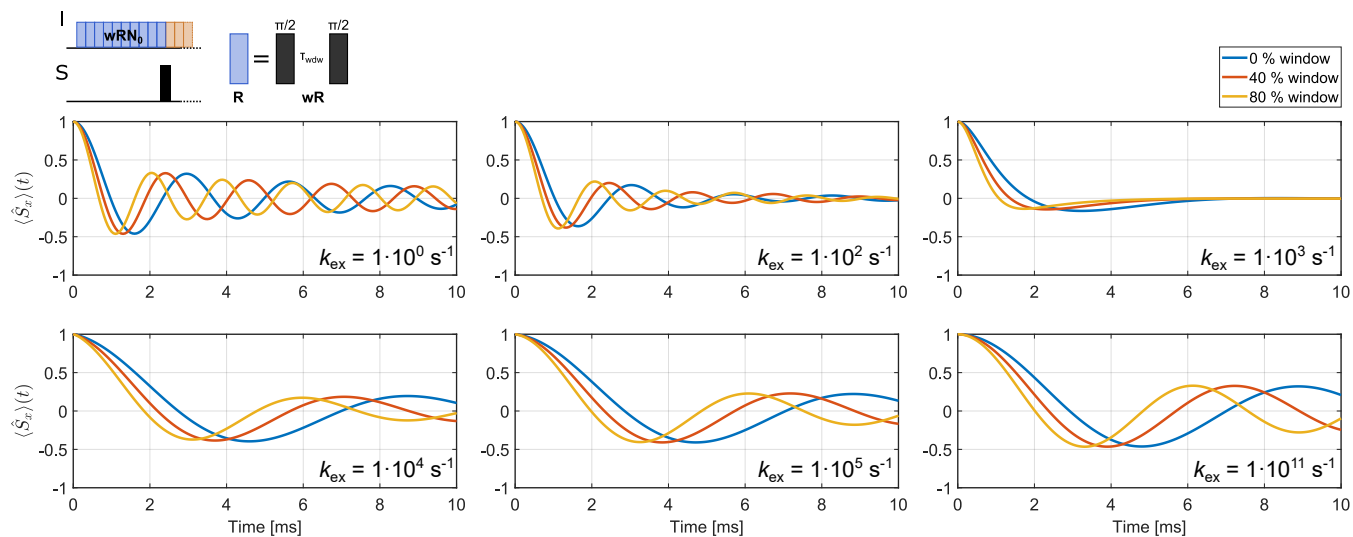

**Figure S8.** Effect of the introduction of a window in the basic R element of the wPARS sequence on the observed recoupling behaviour in dynamic systems. The basic R element consists of a  $\pi$ -pulse that can be separated into two  $\frac{\pi}{2}$ -pulses with a window without rf irradiation. This results in the scaling of the heteronuclear dipolar coupling and faster oscillations are observed for longer windows. The effects of molecular motion on the appearance of the recoupling curve are similar for all window fractions. Data is shown for a MAS frequency of 20 kHz, a dipolar coupling of  $\delta_{\text{IS}}/(2\pi) = 5$  kHz and  $\theta = 70.5^\circ$ . The required radio-frequency field strength depends on the window fraction and increases with increasing window fraction.

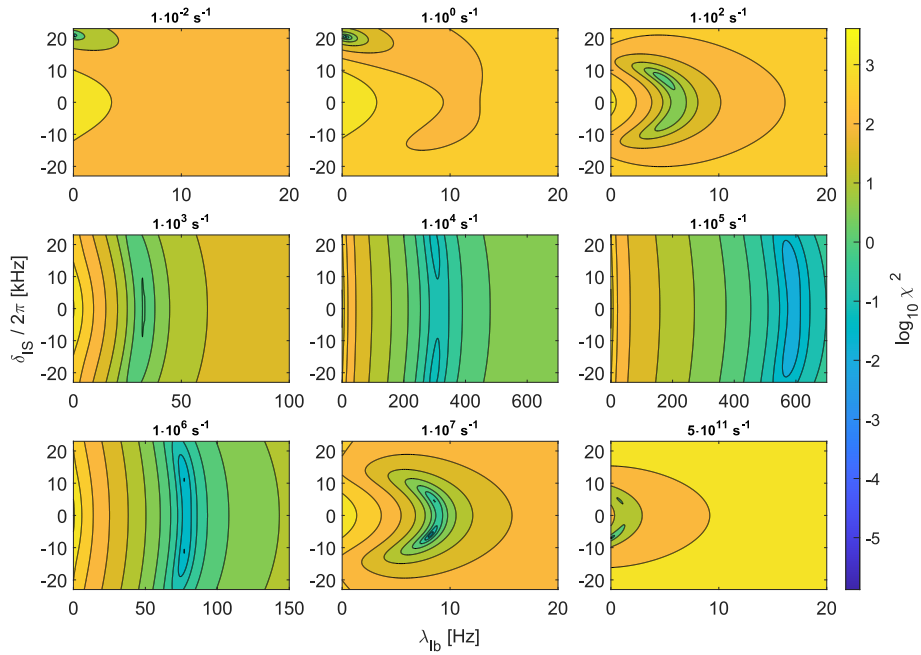

**Figure S9.** Contour plots of the  $\chi^2$  value for the two-dimensional  $\lambda_{\text{lb}}$  and  $\delta_{\text{IS}}$  grid used for fitting the dephasing curves in off-magic-angle spinning simulations of a heteronuclear spin pair ( $J = -90$  Hz,  $\delta_{\text{IS}}/(2\pi) = 21$  kHz). Shown are results for an angle offset of  $\Delta = 0.05^\circ$  and a spinning frequency of 20 kHz for different exchange-rate constants for a three-site jump process with an opening angle of  $\theta = 70.5^\circ$ . In the limit of slow ( $k_{\text{ex}} = 1 \cdot 10^{-2} \text{ s}^{-1}$ ) and fast ( $k_{\text{ex}} = 1 \cdot 10^{11} \text{ s}^{-1}$ ) exchange, the  $\chi^2$ -minimum is located at the full and scaled interaction (order parameter of  $S_{\text{D}} = -\frac{1}{3}$ ). In the intermediate exchange regime (ca.  $1 \cdot 10^3 \text{ s}^{-1} < k_{\text{ex}} < 1 \cdot 10^6 \text{ s}^{-1}$ ) signal decay due to relaxation leads to an elongated  $\chi^2$ -minimum prohibiting the extraction of a well-defined  $\delta_{\text{IS}}^{\text{fit}}$ . In the transition region (from full to scaled dipolar coupling,  $k_{\text{ex}} \approx 1 \cdot 10^2 \text{ s}^{-1}$ ), the sign of the anisotropy of the dipolar coupling is not well defined.

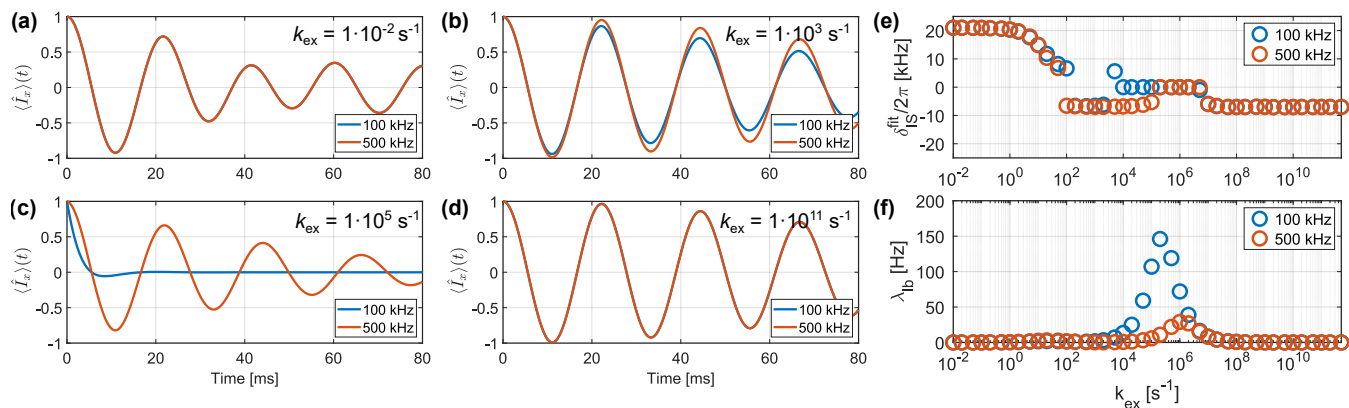

**Figure S10.** Simulated off-MAS dephasing curves for spinning frequencies of 100 kHz and 500 kHz for a heteronuclear spin pair with  $\delta_{\text{IS}}/(2\pi) = 20$  kHz for an angle offset of  $\Delta = 0.05^\circ$ . The underlying molecular motion was modeled as a three-site jump process with an opening angle of  $\theta = 70.5^\circ$  corresponding to an order parameter of  $S_D = -\frac{1}{3}$ . a-d) Comparison of dephasing curves for different exchange-rate constants. In the limit of fast and slow exchange, the dephasing curves obtained for the two spinning frequencies are identical (a and d). In the intermediate exchange regime (b and c) loss of magnetization due to relaxation is significantly slower at 500 kHz. e-f) Fitted apparent  $\delta_{\text{IS}}^{\text{fit}}$  (e) and line broadening parameter  $\lambda_{\text{lb}}$  (f) as a function of the exchange-rate constant. For a spinning frequency of 500 kHz the range of exchange-rate constants where rapid relaxation (strong linebroadening) prevents the extraction of  $\delta_{\text{IS}}^{\text{fit}}$  is significantly narrower. Efficient relaxation is only observed for exchange-rate constants between ca.  $1 \cdot 10^5 \text{ s}^{-1} - 1 \cdot 10^7 \text{ s}^{-1}$ . Therefore, the full transition from the full to the scaled coupling can be characterized.

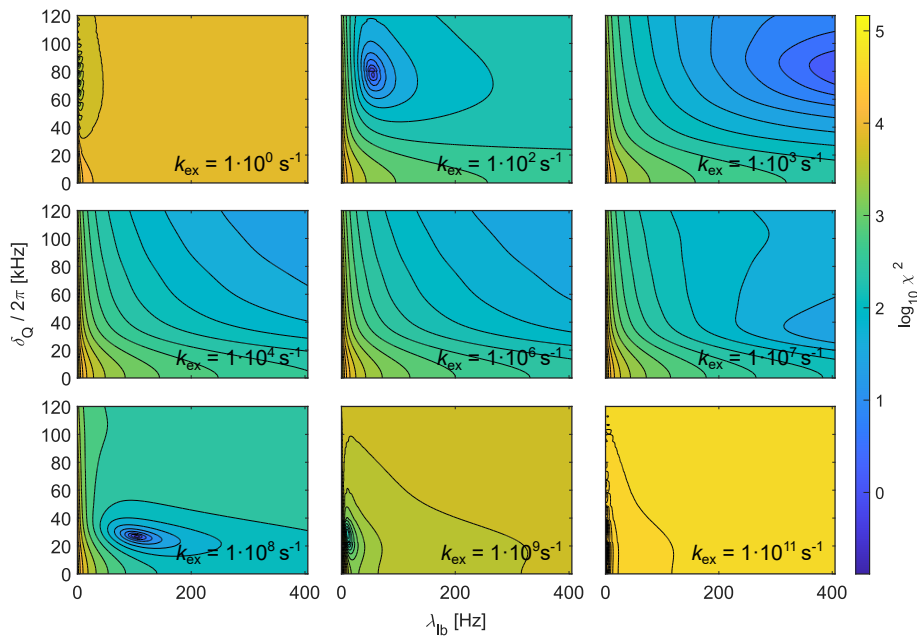

**Figure S11.** Contour plots of  $\chi^2$  for the grid of  $\lambda_{\text{lb}}$  and  $\delta_{\text{Q}}$  used for fitting of FIDs of  $^2\text{H}$  under MAS with a spinning frequency of 20 kHz for different exchange-rates. Prior to  $\chi^2$ -fitting, a frequency shift is applied to the FID to ensure that the central peak in the spectrum corresponds to a shift of 0 Hz. The anisotropy of the quadrupolar coupling tensor was set to  $\delta_{\text{Q}}/(2\pi) = 80$  kHz and the opening angle of the exchange process was assumed to be  $\theta = 70.5^\circ$ . In the intermediate exchange regime, the line broadening observed in the simulations exceeds the grid considered for the fitting. For fast exchange, small differences in the position of the central transition due to second-order quadrupolar contributions lead to large  $\chi^2$  values.
